# Supplementary material for: Impact of vehicular emissions on the formation of fine particles in the Sao Paulo Metropolitan Area: a numerical study with the WRF-Chem model
Source: Copernicus journal article supplement (doi:10.5194/acp-16-777-2016), 2016-01-25
Supplement: Supplementary file 1 [file acp-16-777-2016-supplement.zip]

Archive with 5 entries (5 files):
- acp-16-777-2016-supplement-title-page.pdf
- figS2.pdf
- supplement.pdf
- figS1.pdf
- supplement.docx
