# Supplementary material for: Impact of vehicular emissions on the formation of fine particles in the Sao Paulo Metropolitan Area: a numerical study with the WRF-Chem model
Source: Copernicus journal article supplement (doi:10.5194/acp-16-777-2016), 2016-01-25
Supplement: Supplementary file 1 [file acp-16-777-2016-supplement.zip › acp-16-777-2016-supplement-title-page.pdf]

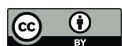

## *Supplement of*

# **Impact of vehicular emissions on the formation of fine particles in the Sao Paulo Metropolitan Area: a numerical study with the WRF-Chem model**

**A Vara-Vela et al.**

*Correspondence to:* A. Vara-Vela ([angel.vela@iag.usp.br](mailto:angel.vela@iag.usp.br))

- [acp-16-777-2016-supplement-title-page.pdf](#)
- [figS1.pdf](#)
- [figS2.pdf](#)
- [supplement.docx](#)
- [supplement.pdf](#)

The copyright of individual parts of the supplement might differ from the CC-BY 3.0 licence.
