# Supplementary figures and images for: Impact of vehicular emissions on the formation of fine particles in the Sao Paulo Metropolitan Area: a numerical study with the WRF-Chem model
Source: Copernicus journal article supplement (doi:10.5194/acp-16-777-2016), 2016-01-25

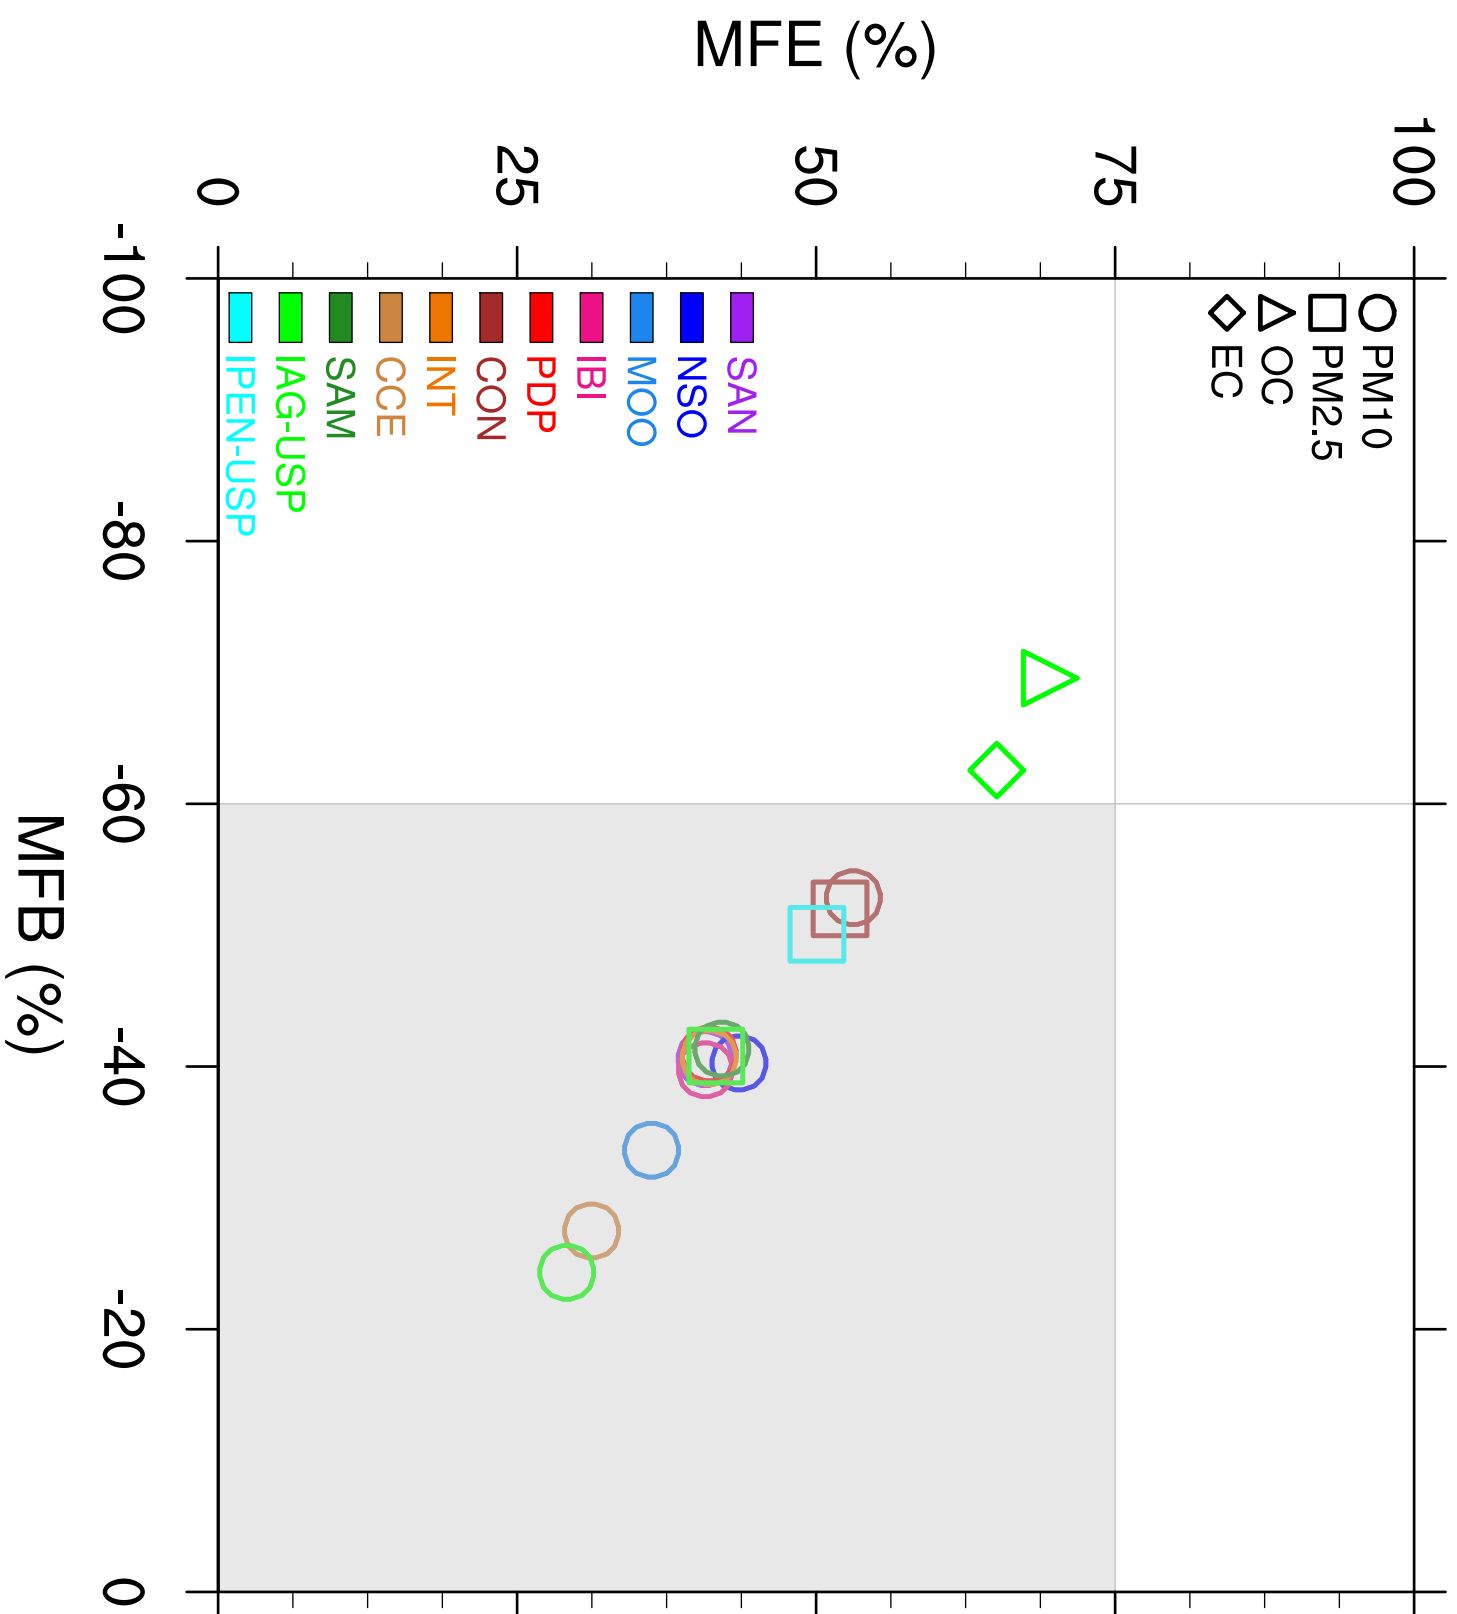

Supplement: Supplementary file 1 [file acp-16-777-2016-supplement.zip › figS2.pdf]

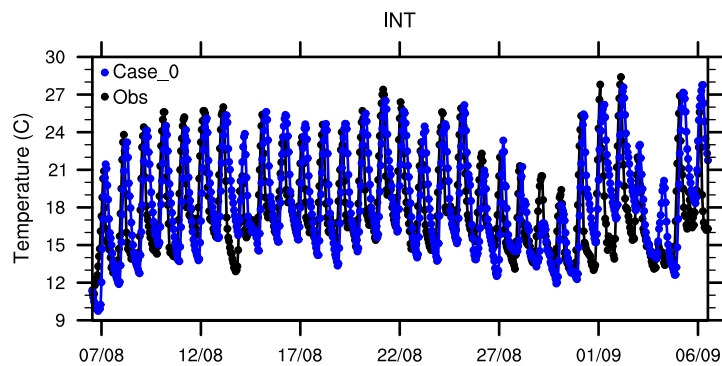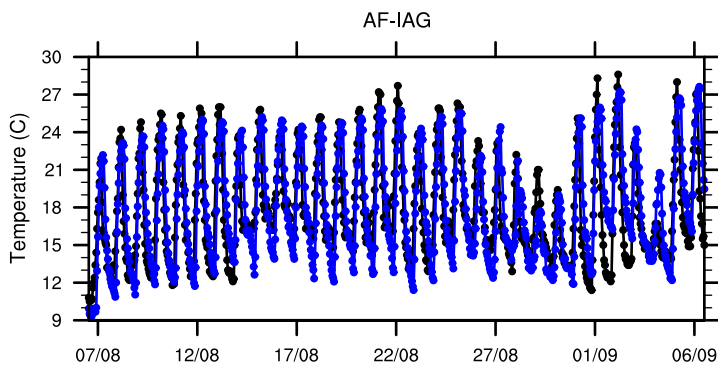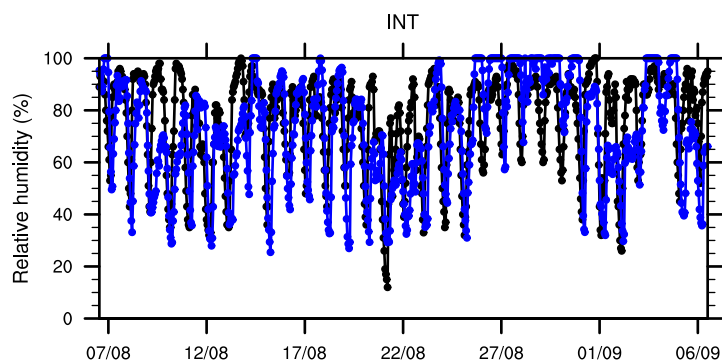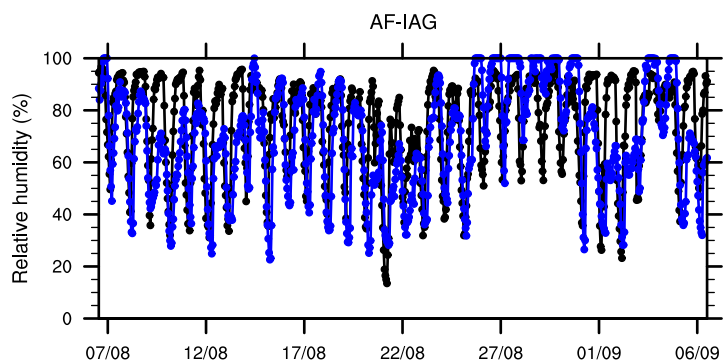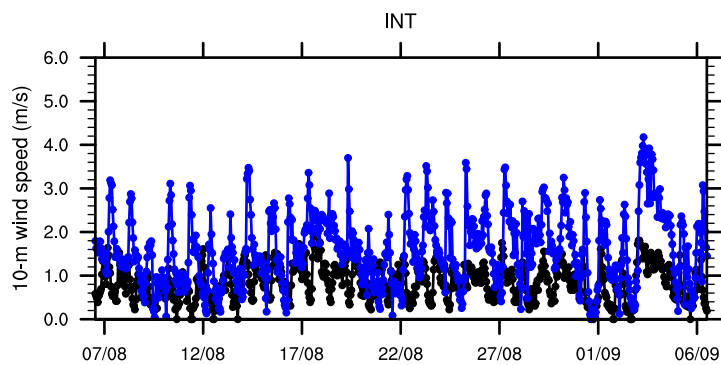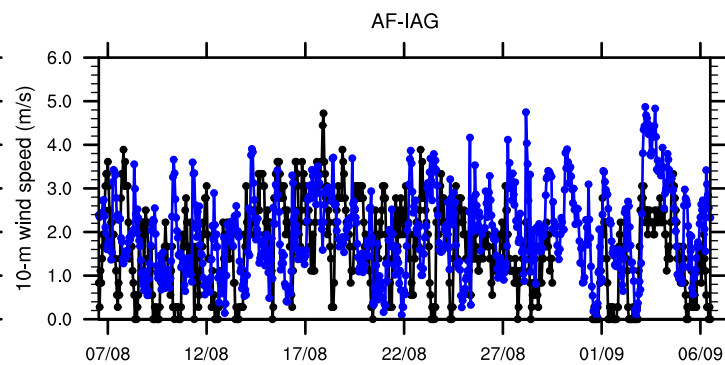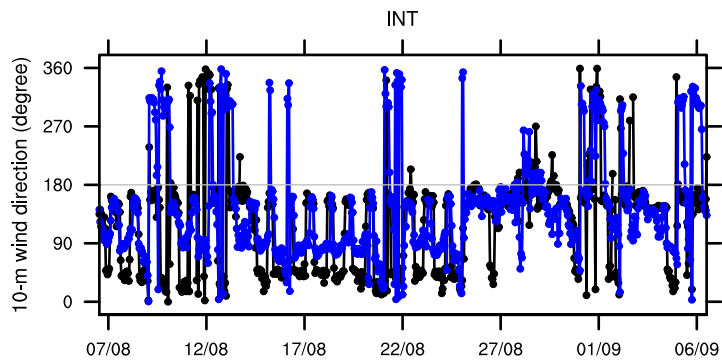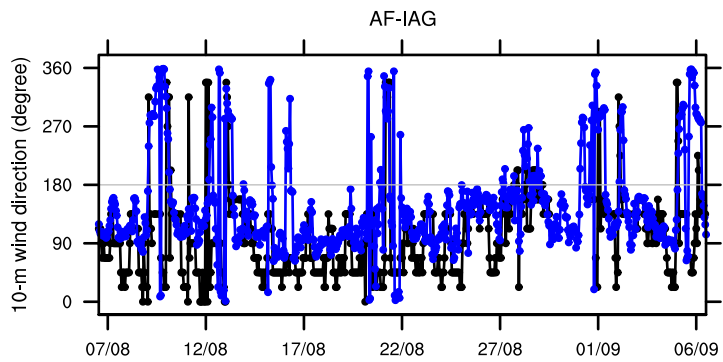

Supplement: Supplementary file 1 [file acp-16-777-2016-supplement.zip › figS1.pdf]
